# Annals of Oncology

Official Journal of the  
European Society for Medical Oncology

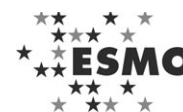

## Volume 18, 2007 Supplement 4

5<sup>th</sup> International Symposium on Targeted Anticancer Therapies (TAT 2007)

8–10 March, 2007: Amsterdam, The Netherlands

|                                                                                     |      |                                                                                      |      |
|-------------------------------------------------------------------------------------|------|--------------------------------------------------------------------------------------|------|
| TAT 2007 sponsors & grants                                                          | iv5  | plenary session 5: signal transduction modulators and mitosis inhibitors             | iv23 |
| welcome to TAT 2007!                                                                | iv6  | plenary session 6: immunotherapeutic approaches to cancer therapy                    | iv24 |
| MDICT Task Force: Methodology for the Development of Innovative Cancer Therapies    | iv7  | plenary session 7: new drug targets                                                  | iv26 |
| committees                                                                          | iv8  | plenary session 8: methodological and regulatory issues in oncology drug development | iv28 |
| meeting schedule: overview                                                          | iv9  | plenary session 9: proffered papers and poster review                                | iv29 |
| meeting schedule, Thursday, March 8                                                 | iv10 | plenary session 10: apoptosis as a drug target                                       | iv30 |
| meeting schedule, Friday, March 9                                                   | iv11 | poster session 1: new drug targets                                                   | iv31 |
| meeting schedule, Saturday, March 10                                                | iv16 | poster session 2: preclinical drug profiles                                          | iv33 |
|                                                                                     |      | poster session 3: prodrugs, conjugates and new formulations                          | iv38 |
| <b>abstracts</b>                                                                    |      | poster session 4: clinical studies                                                   | iv39 |
| plenary session 1: opening, keynotes and reviews                                    | iv17 | poster session 5: angiogenesis and tumor vasculature                                 | iv42 |
| plenary session 2: phase I & II studies of targeted agents                          | iv18 | poster session 6: signalling pathways and apoptosis                                  | iv44 |
| plenary session 3: angiogenesis inhibitors and vascular targeting agents            | iv20 | poster session 7: molecular diagnosis, patient selection and prognosis               | iv47 |
| plenary session 4: inhibitors of growth factor receptors and their tyrosine kinases | iv21 | subject index                                                                        | iv51 |
|                                                                                     |      | author index                                                                         | iv53 |
